# Supplementary material
Source: Springer Nature journal article supplement (https://www.springermedizin.de/resource/supplementary/13561_2012_37_MOESM3_ESM.pdf/9687280)
Supplement: MOESM3 [file 9687280]

| Cost- matrix                   | Labor costs                  |                              |                          |                  | Material costs          |                         |                              |                         | Infrastructure costs         |             |
|--------------------------------|------------------------------|------------------------------|--------------------------|------------------|-------------------------|-------------------------|------------------------------|-------------------------|------------------------------|-------------|
| Cost category groups           | Physicians                   | Nursing                      | Medical/ technical staff | Drugs general    | Drugs individual        | Implants and grafts     | Material                     | Material individual     | Medical                      | Non-medical |
|                                |                              |                              |                          |                  |                         |                         |                              |                         |                              |             |
| Ward                           | Care days                    | Weighted minutes             | Care days                | Weighted minutes | Actual usage/unit costs | -                       | Weighted minutes             | Actual usage/unit costs | Care days                    |             |
| Intensive care                 | Weighted hours               |                              |                          |                  |                         | Actual usage/unit costs | Weighted hours               |                         | Weighted hours               |             |
| Dialysis                       | Weighted dialysis            |                              |                          |                  |                         | -                       | Weighted dialysis            |                         | Weighted dialysis            |             |
| Operating rooms                | Surgery times and setup time | Surgery times and setup time |                          |                  |                         | Actual usage unit costs | Surgery times and setup time |                         | Surgery times and setup time |             |
| Anesthesia                     |                              | Anesthesia times             | Anesthesia times         |                  |                         | -                       | Anesthesia times             |                         | Anesthesia times             |             |
| Delivery ward                  | Time in delivery ward        | Time in delivery ward        |                          |                  |                         | -                       | Time in delivery ward        |                         | Time in delivery ward        |             |
| Cardiac diagnostics/therapy    | Point system/duration        | Point system/duration        |                          |                  |                         | Actual usage/unit costs | Point system/duration        |                         | Point system/duration        |             |
| Endoscopic diagnostics/therapy |                              | Point system/duration        |                          |                  |                         |                         | Point system/duration        |                         | Point system/duration        |             |
| Radiology                      | Point system                 | Point system                 |                          |                  |                         | Actual usage/unit costs | Point system                 |                         | Point system                 |             |
| Laboratories                   |                              | Point system                 |                          |                  |                         |                         | Point system                 |                         | Point system                 |             |
| Further diagnostics/therapy    | Point system/duration        |                              |                          |                  | Actual usage/unit costs | Point system/duration   | Point system/duration        |                         |                              |             |
